# Supplementary material for: Variations in Gut Microbiome Are Associated with Prognosis of Hypertriglyceridemia-Associated Acute Pancreatitis
Source: MDPI journal article supplement (doi:10.3390/biom11050695), 2021-05-06
Supplement: s1 [file s1]

# **Variations in gut microbiome are associated with prognosis of hypertriglyceridemia-associated acute pancreatitis**

**Short Title:** Gut microbiome and prognosis of HTGAP

Xiaomin Hu<sup>1#</sup>, Liang Gong<sup>2#</sup>, Ruilin Zhou<sup>3#</sup>, Ziyang Han<sup>2</sup>, Li Ji<sup>2</sup>, Yan Zhang<sup>4</sup>, Shuyang Zhang<sup>3</sup>, Dong Wu<sup>2\*</sup>

<sup>1</sup> Department of Gastroenterology, Department of Medical Research Center, State Key Laboratory of Complex Severe and Rare Diseases, Peking Union Medical College Hospital, Chinese Academy of Medical Science & Peking Union Medical College, 100730, Beijing, China.

<sup>2</sup> Department of Gastroenterology, State Key Laboratory of Complex Severe and Rare Diseases, Peking Union Medical College Hospital, Chinese Academy of Medical Sciences & Peking Union Medical College, 100730, Beijing, China

<sup>3</sup> Department of Cardiology, Peking Union Medical College Hospital, Chinese Academy of Medical Science & Peking Union Medical College, 100730, Beijing, China.

<sup>4</sup> Institute of Cardiovascular Sciences and Key Laboratory of Molecular Cardiovascular Sciences, School of Basic Medical Sciences, Ministry of Education, Peking University Health Science Center, Beijing, China.

# These authors contributed equally to this work.

\* Correspondence to Dong Wu, MD. Department of Gastroenterology, State Key Laboratory of Complex Severe and Rare Diseases, Peking Union Medical College Hospital, Chinese Academy of Medical Sciences & Peking Union Medical College, No.1 Shuaifuyuan, 100730, Beijing, China. E-Mail: wudong@pumch.cn

**Supplementary Table****Table S1.** ASV table summary

| <b>Sample ID</b> | <b>Group</b> | <b>Sequence counts</b> | <b>ASV number</b> |
|------------------|--------------|------------------------|-------------------|
| E1               | HTGAP        | 32402                  | 406               |
| E10              | HTGAP        | 8671                   | 553               |
| E11              | HTGAP        | 12549                  | 271               |
| E12              | HTGAP        | 14150                  | 257               |
| E14              | HTGAP        | 41907                  | 396               |
| E16              | Non-HTGAP    | 38287                  | 446               |
| E17              | HTGAP        | 15237                  | 179               |
| E18              | Non-HTGAP    | 9243                   | 351               |
| E2               | Non-HTGAP    | 31212                  | 459               |
| E20              | HTGAP        | 38993                  | 569               |
| E21              | HTGAP        | 41410                  | 551               |
| E23              | Non-HTGAP    | 10974                  | 372               |
| E24              | Non-HTGAP    | 10771                  | 236               |
| E25              | HTGAP        | 33704                  | 407               |
| E26              | HTGAP        | 38360                  | 483               |
| E27              | Non-HTGAP    | 33508                  | 378               |
| E28              | Non-HTGAP    | 33664                  | 370               |
| E29              | HTGAP        | 10992                  | 427               |
| E30              | Non-HTGAP    | 32272                  | 409               |
| E31              | Non-HTGAP    | 32962                  | 300               |
| E32              | Non-HTGAP    | 36101                  | 484               |
| E33              | Non-HTGAP    | 31336                  | 583               |
| E35              | HTGAP        | 12785                  | 197               |
| E36              | HTGAP        | 13178                  | 403               |
| E37              | Non-HTGAP    | 28800                  | 408               |
| E39              | HTGAP        | 39409                  | 68                |
| E40              | Non-HTGAP    | 35831                  | 337               |
| E41              | Non-HTGAP    | 15577                  | 134               |
| E42              | Non-HTGAP    | 8962                   | 327               |
| E43              | Non-HTGAP    | 30759                  | 408               |
| E44              | Non-HTGAP    | 30039                  | 425               |
| E47              | Non-HTGAP    | 6682                   | 332               |
| E48              | Non-HTGAP    | 12798                  | 406               |
| E49              | Non-HTGAP    | 21060                  | 582               |
| E5               | HTGAP        | 7746                   | 318               |
| E51              | HTGAP        | 40852                  | 480               |
| E52              | Non-HTGAP    | 34009                  | 398               |
| E53              | Non-HTGAP    | 12435                  | 350               |
| E54              | HTGAP        | 31095                  | 394               |
| E55              | HTGAP        | 43515                  | 276               |
| E56              | HTGAP        | 37401                  | 476               |

|     |           |       |     |
|-----|-----------|-------|-----|
| E57 | HTGAP     | 41914 | 74  |
| E58 | HTGAP     | 14265 | 326 |
| E59 | HTGAP     | 12131 | 505 |
| E6  | Non-HTGAP | 35773 | 566 |
| E60 | HTGAP     | 14933 | 430 |
| E61 | HTGAP     | 40959 | 425 |
| E62 | Non-HTGAP | 20419 | 439 |
| E63 | Non-HTGAP | 31289 | 318 |
| E64 | Non-HTGAP | 35677 | 299 |
| E65 | Non-HTGAP | 9250  | 355 |
| E66 | HTGAP     | 14800 | 404 |
| E67 | HTGAP     | 25179 | 542 |
| E68 | HTGAP     | 46528 | 383 |
| E69 | Non-HTGAP | 34924 | 370 |
| E7  | HTGAP     | 40944 | 448 |
| E72 | HTGAP     | 5333  | 227 |
| E73 | HTGAP     | 30122 | 314 |
| E74 | Non-HTGAP | 35340 | 493 |
| E8  | Non-HTGAP | 23709 | 455 |

---

ASV, amplicon sequence variants; HTGAP, hypertriglyceridemia-associated acute pancreatitis.

### Supplementary Figures

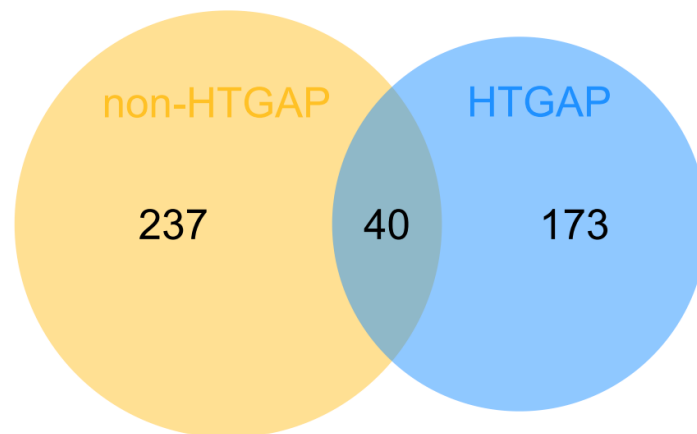

**Figure S1.** A Venn diagram demonstrating the existence of ASVs with a relative abundance  $> 0.1\%$  in two groups. ASV, amplicon sequence variants.

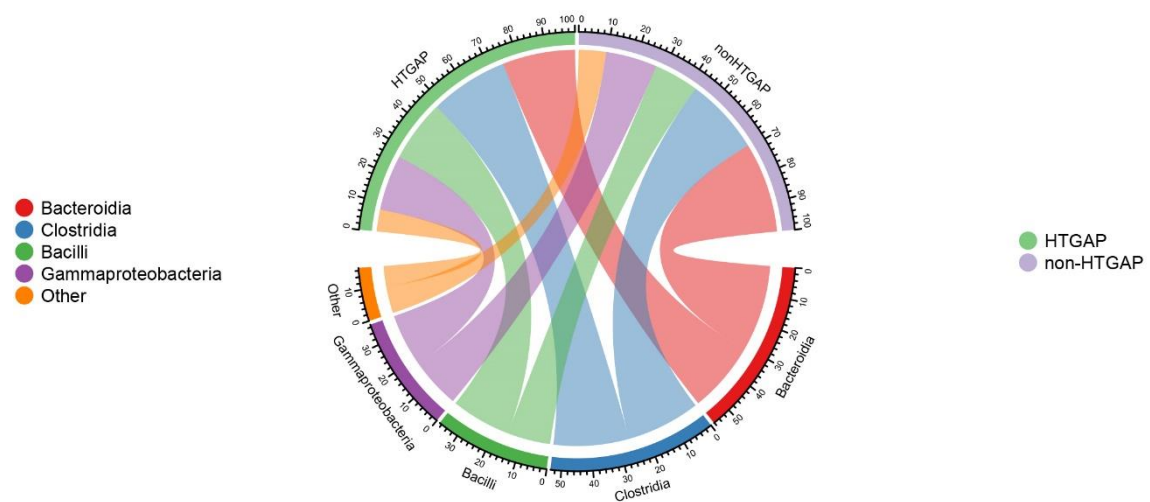

**Figure S2.** A chord diagram showing connections between microbiota composition and groups of patients. The width of the chords is determined by the relative abundance of bacteria at class level. HTGAP, hypertriglyceridemia-associated acute pancreatitis.

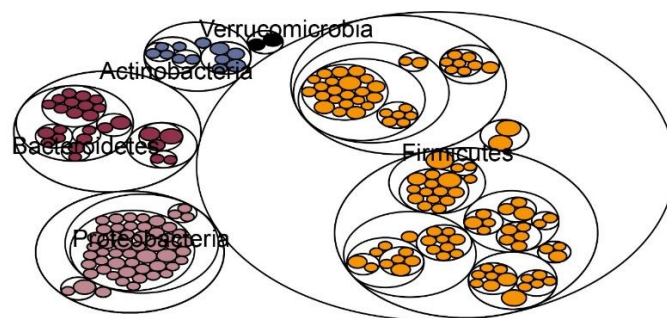

**Figure S3.** A maptree showing the phylogenetic relationship among intestinal microflora at phylum level. The largest circle represented the phylum level, and the gradually shrinking circle represented the classification level from the family to the species. The diameter of each circle is proportional to the relative abundance of the taxon.
